# Supplementary material
Source: PubMed Central journal article supplement (PMC10658790)
Supplement: joces-135-259272-s1.pdf [file joces-135-259272-s1.pdf]

Supplementary Figure 1

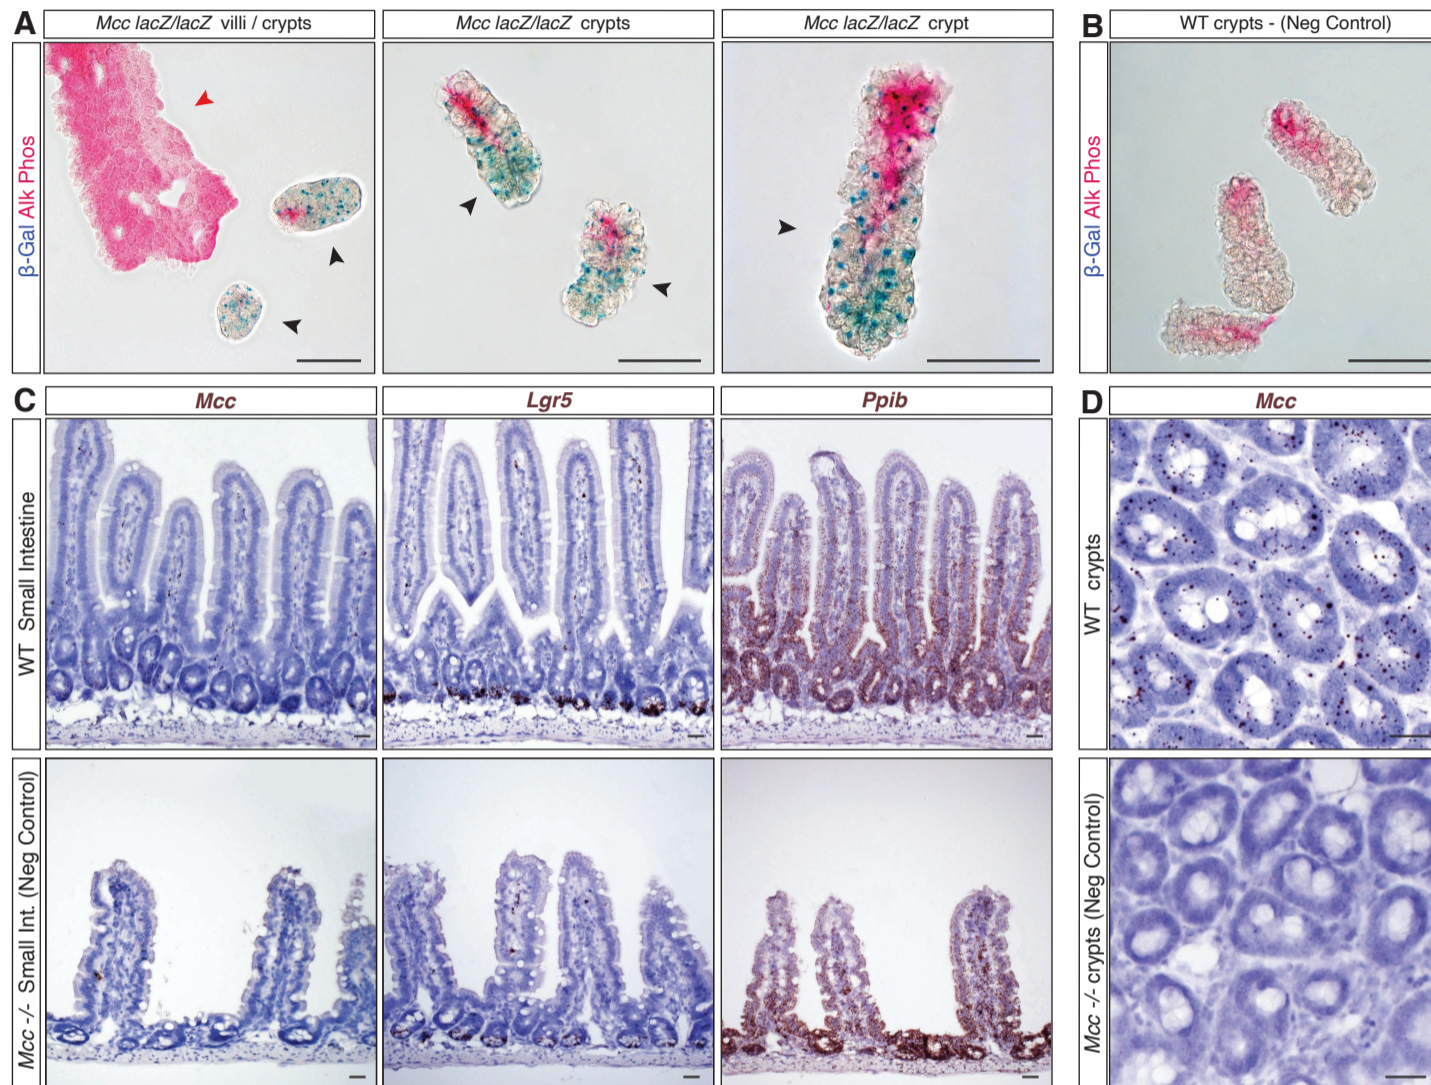

**Fig. S1. β-Galactosidase (β-Gal) staining activity and in situ hybridization (ISH) controls. (A):** Co-staining for β-Gal (blue) activity and intestinal alkaline phosphatase (red) in whole-mount villus (red arrowhead) and crypt (black arrowheads) fractions isolated from *Mcc<sup>lacZ/lacZ</sup>* adult small intestine (SI). **(B):** Wild type (WT) β-Gal-negative crypt controls. Scale bars, 50 μm. **(C):** ISH for the expression of *Mcc*, *Lgr5* and *Ppib* (positive control) on WT and *Mcc<sup>lacZ/lacZ</sup>* (= *Mcc*<sup>-/-</sup> negative control) mouse SI sections. Endogenous *Mcc* expression is not detected on *Mcc*<sup>-/-</sup> tissues. **(D):** ISH for *Mcc* on transverse sections of WT and *Mcc*<sup>-/-</sup> SI crypts. *Mcc* expression is not detected on *Mcc*<sup>-/-</sup> crypts. Scale bars, 20 μm.

### Supplementary Figure 2

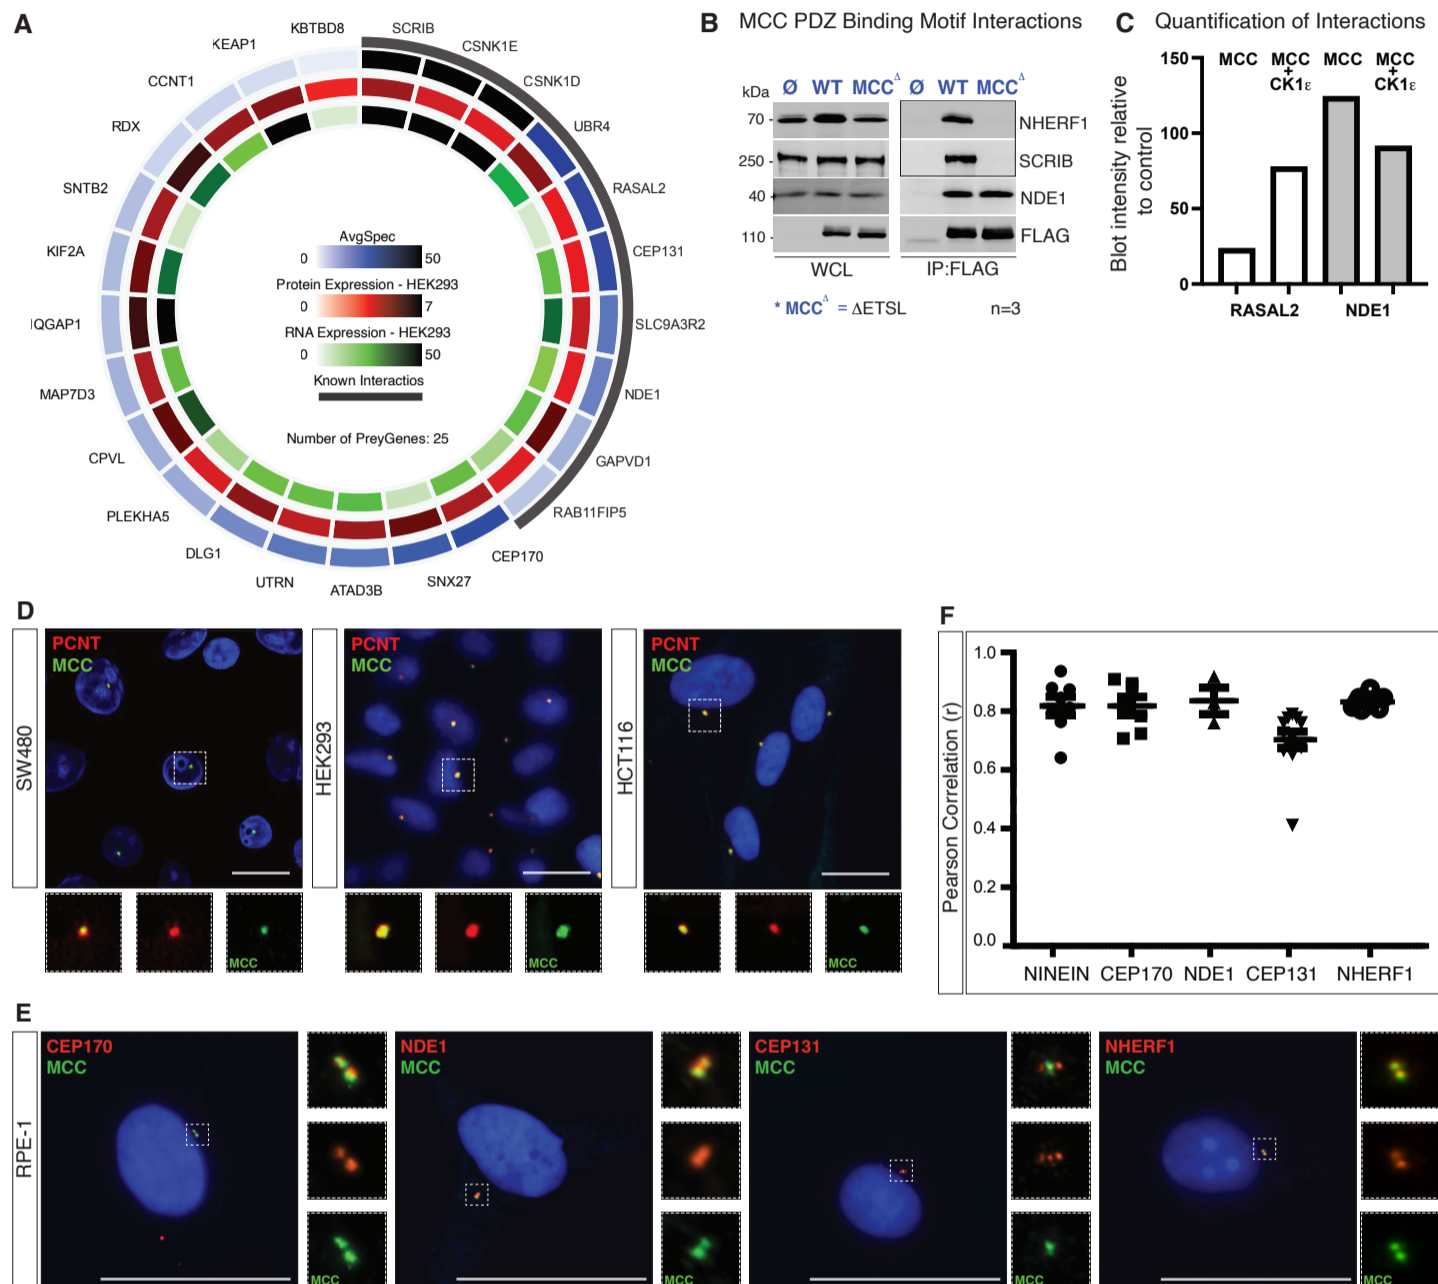

**Fig. S2. MCC interactions and subcellular localization across human cell lines. (A):** Visualization of high-confidence MCC interactions (showing 25 preys) based on Significance Analysis of INteractome (SAINTexpress), indicating previously reported interactions from the BioGRID interaction database (thebiogrid.org), protein expression levels from Proteomics DB (proteomicsdb.org), and RNA expression levels from Protein Atlas (proteinatlas.org). **(B):** Truncation of the PDZ binding motif (PBM) (-ETSL) of MCC (MCCA) disrupts interaction to NHERF1 and SCRIB, but not to NDE1 in HEK293 cells. WCL, whole cell lysate. IP: Immunoprecipitation. IB: Immunoblotting. **(C):** Western blot quantification analysis for Figure 4D. RASAL2 and NDE1 affinity to MYC-MCC changes upon co-expression of FLAG-CK1 $\epsilon$  in HEK293 cells. Western blot images are representative of  $n = 3$ . **(D):** Immunofluorescence (IF) shows colocalization of MCC and PERICENTRIN (PCNT) at the centrosome in SW480, HEK293, and HCT116 cells. Scale bars, 50  $\mu\text{m}$ . **(E):** IF in RPE-1 cells shows colocalization of MCC and CEP170, NDE1, CEP131, and NHERF1. All images shown are representative of at least 5 experiments. **(F):** Pearson correlation coefficient ( $r$ ) reveals strong positive linear correlation ( $>0.5$ ) between the signal positions of MCC and several of its interacting partners at the centrosome in RPE-1 cells.

Supplementary Figure 3

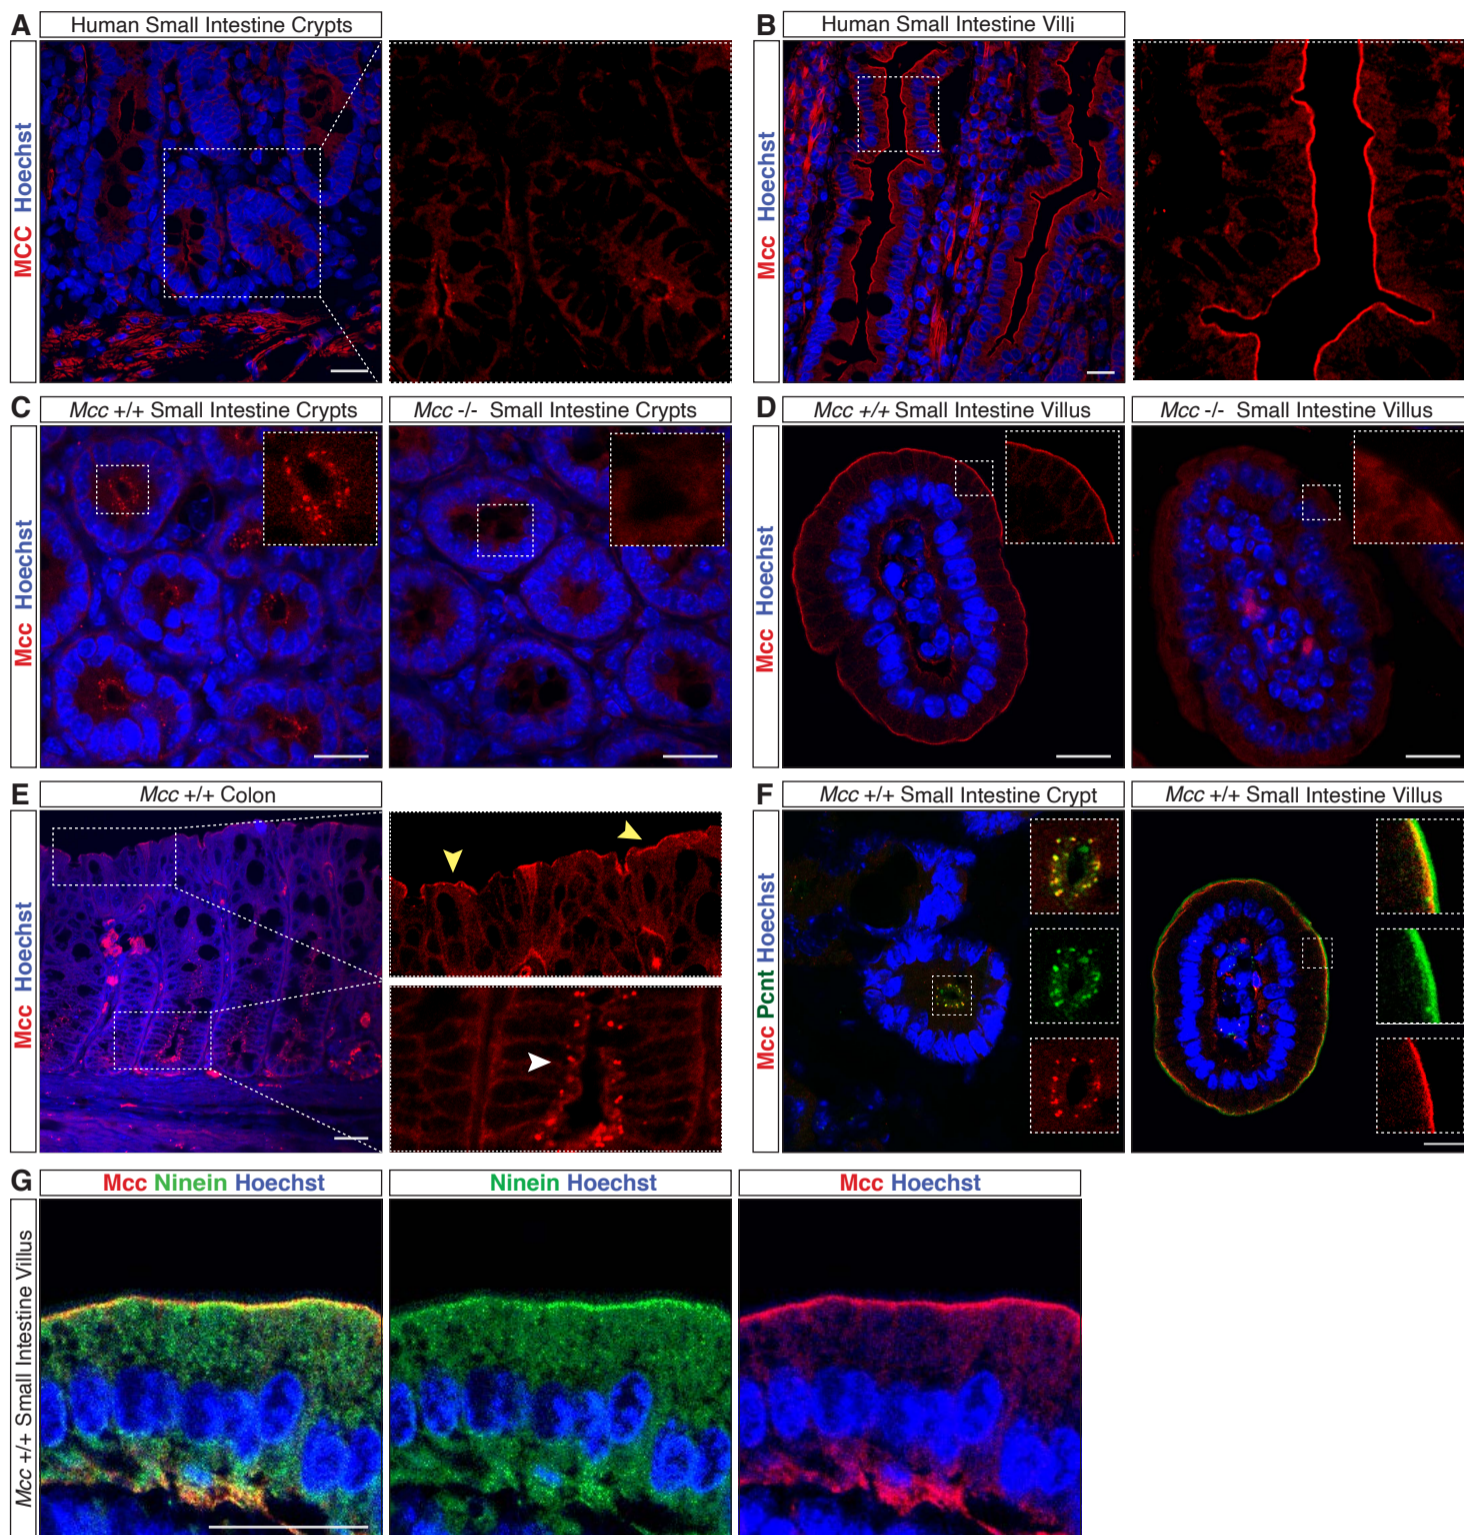

**Fig. S3. MCC dynamic localization in the intestine and antibody specificity control for immunofluorescence (IF) in the intestine. (A):** IF for MCC on sections of human SI shows MCC localizing at the centrosome in crypt cells. **(B):** IF for MCC on sections of human SI shows MCC localizing at the apical membrane of differentiated cells in villi. **(C-D):** IF for Mcc localization on wild-type (WT) and *Mcc<sup>lacZ/lacZ</sup>* (= *Mcc*<sup>-/-</sup> negative control) transverse sections of the mouse small intestine (SI). **(C):** Mcc localizes to the centrosome (punctate staining) in crypts and **(D)** at the apical membrane of differentiated cells in the villus units. *Mcc*<sup>-/-</sup> sections show absence of Mcc signal in crypts **(C)** and villi **(D)**. **(E):** IF for Mcc localization on WT mouse colonic epithelium reveals Mcc at the centrosome in crypt cells (white arrowhead) and at the apical membrane of differentiated cells (yellow arrowheads). **(F):** IF for Mcc and Pcnt shows colocalization at the centrosome in crypt cells and at the apical membrane of villus cells (transverse sections). **(G):** IF for Mcc and Ninein on a WT transverse section of the villus shows colocalization at the apical membrane. Scale bars, 20  $\mu$ m.

Supplementary Figure 4

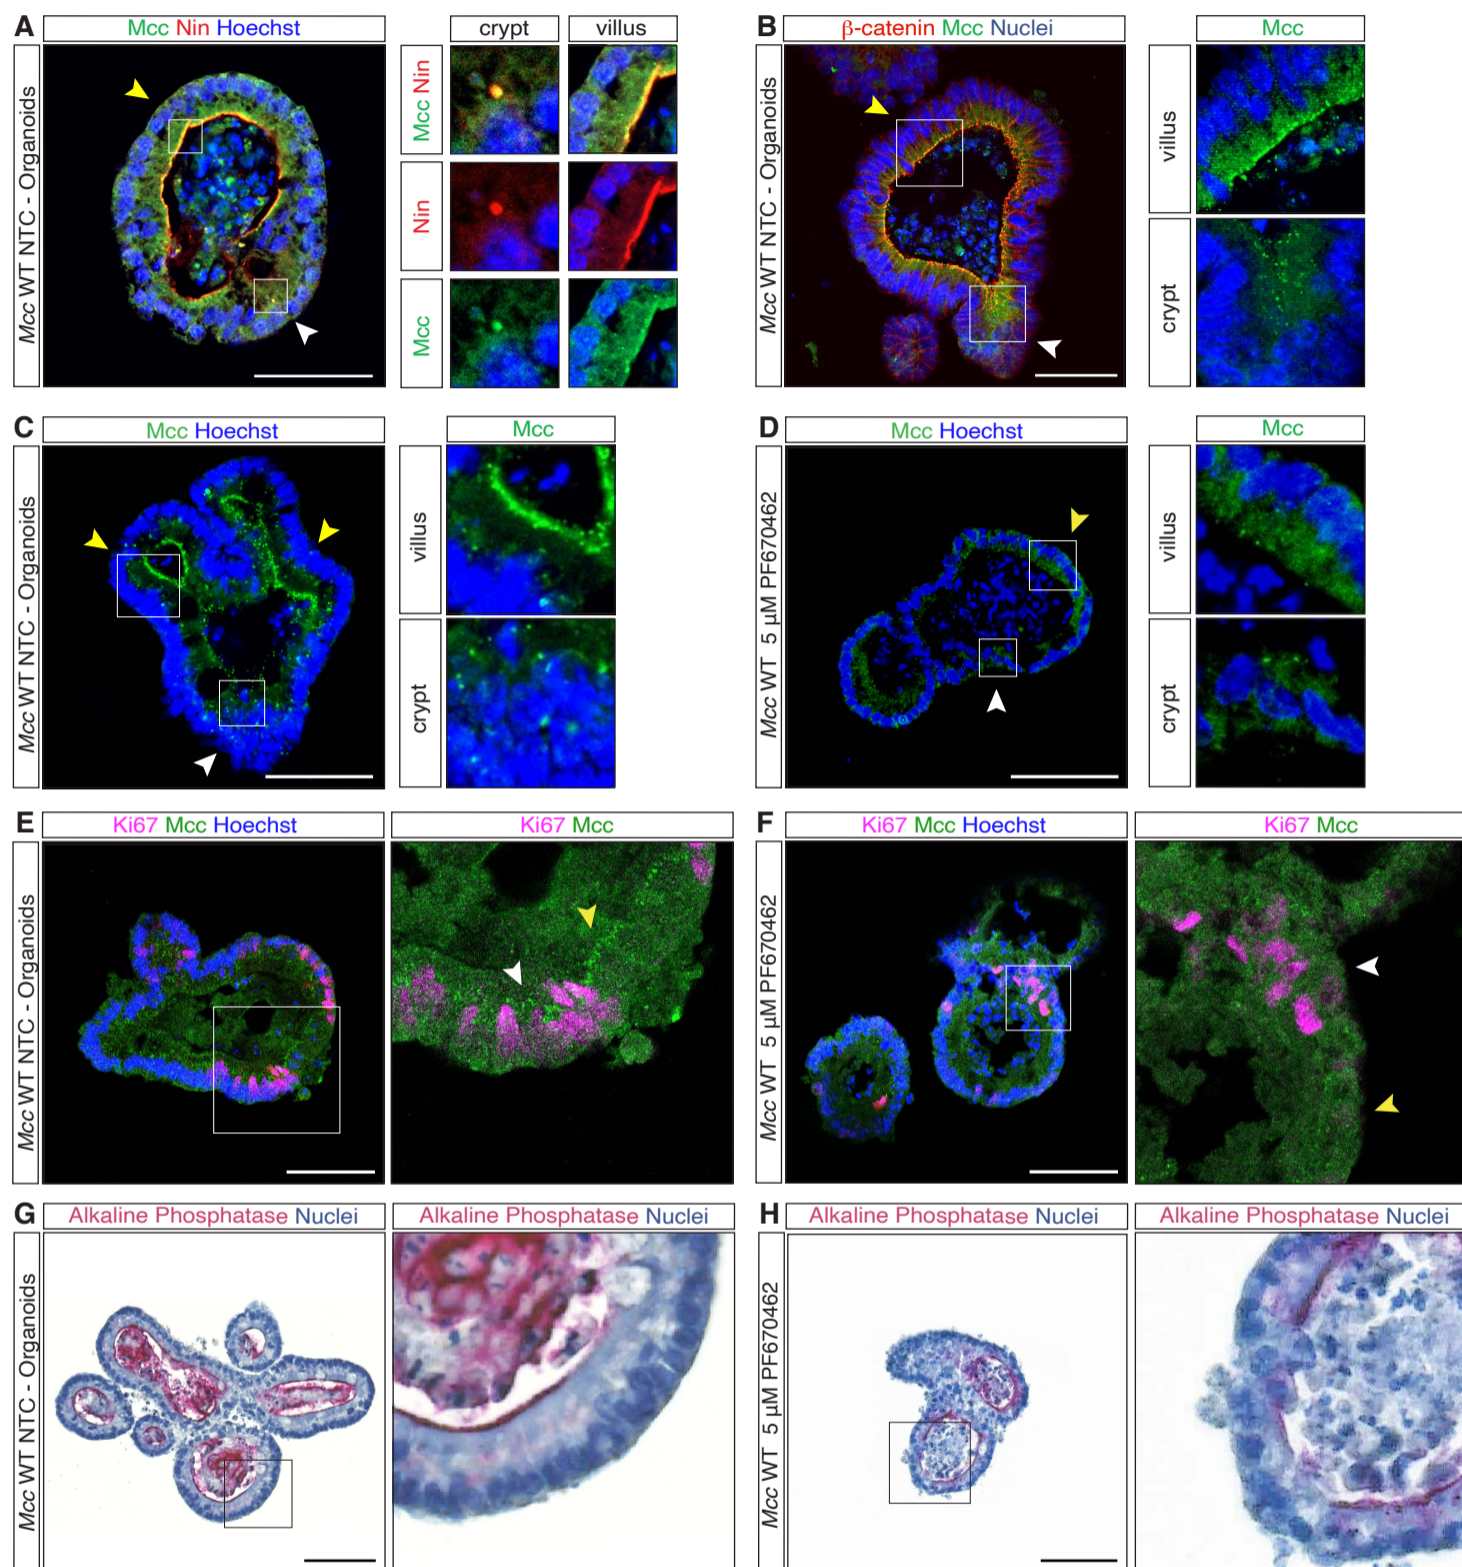

**Fig. S4. Phosphorylation by CK15/ε triggers MCC redeployment to the ncMTOC at the apical membrane of villus cells.** Immunofluorescence (IF) in sections of small intestinal organoids (white arrowheads indicate crypt domains; yellow arrowheads indicate villus domains). **(A):** IF showing Mcc and Ninein localization in the centrosome in crypt cells and along the apical membrane of differentiated cells in non-treated control (NTC) WT organoids. **(B):** IF showing Mcc localization in the centrosome in crypt cells and along the apical membrane of differentiated cells of NTC WT organoids, membrane immunostaining with β-catenin. **(C and D):** IF for MCC in intestinal organoids. Mcc apical membrane localization is disrupted upon treatment with 5 μM of PF670462. **(E and F):** IF for MCC and Ki67 in NTC and PF670462-treated organoids. **(G and H):** Histochemical (HC) staining for Alkaline Phosphatase in sections in NTC and PF670462-treated organoids. Nuclei stained with Hema-toxylin. White/Black-dashed squares highlight regions selected for higher magnification. Scale bars, 20 μm.

**Table S1. Antibodies and Primers**

**Primary Antibodies.**

| Antibody         | Species | Catalog #      | Brand      | Application – Dilution ( $\mu$ L) |
|------------------|---------|----------------|------------|-----------------------------------|
| $\beta$ -actin   | Rabbit  | AB8227         | Abcam      | WB/IP 1:10000, IF 1:250           |
| $\beta$ -catenin | Rabbit  | AB32572        | Abcam      | WB/IP 1:10000, IF 1:200           |
| $\beta$ -tubulin | Mouse   | T8328          | Sigma      | WB/IP 1:10000, IF 1:200           |
| Csnk1e           | Mouse   | (A6) SC-374069 | Santa Cruz | WB/IP 1:15000                     |
| Cep131           | Rabbit  | PA5-54953      | Invitrogen | WB/IP 1:10000, IF 1:200           |
| Cep170           | Rabbit  | AB72505        | Abcam      | WB/IP 1:10000, IF 1:500           |
| Ep-CAM           | Rabbit  | AB71916        | Abcam      | IF 1:250                          |
| E-cadherin       | Rabbit  | AB15148        | Abcam      | IF 1:250                          |
| Iqgap1           | Mouse   | (C9) SC-376021 | Santa Cruz | IP 1:10000                        |
| Mcc              | Mouse   | SC-135982      | Santa Cruz | WB/IP 1:5000, IF 1:50             |
| Nde1             | Rabbit  | PA5-87297      | Invitrogen | WB/IP 1:15000, IF 1:500           |
| Ninein           | Mouse   | 637327         | Merck      | IF 1:250                          |
| Ninein           | Rabbit  | AB4447         | Abcam      | IF 1:250                          |
| Nherf1           | Rabbit  | SC-271552      | Santa Cruz | WB/IP 1:10000, IF 1:500           |
| Pericentrin      | Rabbit  | AB4448         | Abcam      | IF 1:250                          |
| Rasal2           | Rabbit  | A302-109A      | Bethyl Lab | WB/IP 1:10000, IF 1:500           |
| Scribble         | Rabbit  | SC-28737       | Santa Cruz | WB/IP 1:10000, IF 1:200           |

WB: Western Blot  
IP: Immunoprecipitation  
IF: Immunofluorescence

**Secondary Antibodies**

| Antibody                    | Species | Catalog # | Brand      | Application – Dilution ( $\mu$ L) |
|-----------------------------|---------|-----------|------------|-----------------------------------|
| Alexa Fluor 488 Anti-Mouse  | Donkey  | A21202    | Invitrogen | IF 1:1000                         |
| Alexa Fluor 488 Anti-Rabbit | Donkey  | A21206    | Invitrogen | IF 1:1000                         |
| Alexa Fluor 594 Anti-Mouse  | Donkey  | A21203    | Invitrogen | IF 1:1000                         |
| Alexa Fluor 594 Anti-Rabbit | Donkey  | A21207    | Invitrogen | IF 1:1000                         |
| Alexa Fluor 488 Anti-Mouse  | Goat    | A28175    | Invitrogen | IF 1:1000                         |

IF: Immunofluorescence

**qPCR Primers.**

| Gene - Target      |     | 5' > 3' Sequence       | TM   |
|--------------------|-----|------------------------|------|
| <i>Mcc</i> Exon 17 | FWD | ACTTGCCGAACTAAGGACGA   | 52.2 |
| <i>Mcc</i> Exon 18 | REV | CTGGTGTCTGATTTCACTGC   | 53.9 |
| <i>Lgr5</i>        | REV | CCACAGCAACAACATCAGGT   | 55.9 |
| <i>Lgr5</i>        | FWD | AACAAATTGGATGGGGTTGT   | 55.8 |
| $\beta$ -Actin     | FWD | CTTCTTTGCAGCTCCTTCGTTG | 56.3 |
| $\beta$ -Actin     | REV | CGCAGCGATATCGTCATCCA   | 58.4 |

**Table S2. Massive SAINTexpress/ProHits output.** FLAG AP-MS dataset acquired on Orbitrap classic and Orbitrap Velos instruments (SAINTexpress task 5987). Column A is the “Bait”. Prey Accession is the NCBI protein accession number; Prey Gene is as per NCBI Entrez Gene. Spectra (spectral counts) for the prey (column D, separated by “|” delimiter; column E, summed, column F, averaged), number of replicates performed (column G), spectral counts for the prey across all negative controls (column H), Averaged probability across replicates (column I), maximal probability (column J), log Odds score (column K), Fold Change (counts in the purification divided by counts in the controls plus small factor to prevent division by 0; column L) and Bayesian FDR (column M) are listed for each bait-prey relationship and are directly from the SAINTexpress output. Columns N-P are the unique prey peptides as calculated through ProHits. Column Q is the prey protein length and column R is the UniProt accession number. Significant interactors are those with BFDR  $\leq 0.01$ , and are bolded. Significant Prey Genes highlighted in yellow contain PDZ domains, those in blue regulate GTPases, and those in orange are centrosomal components.

[Click here to download Table S2](#)

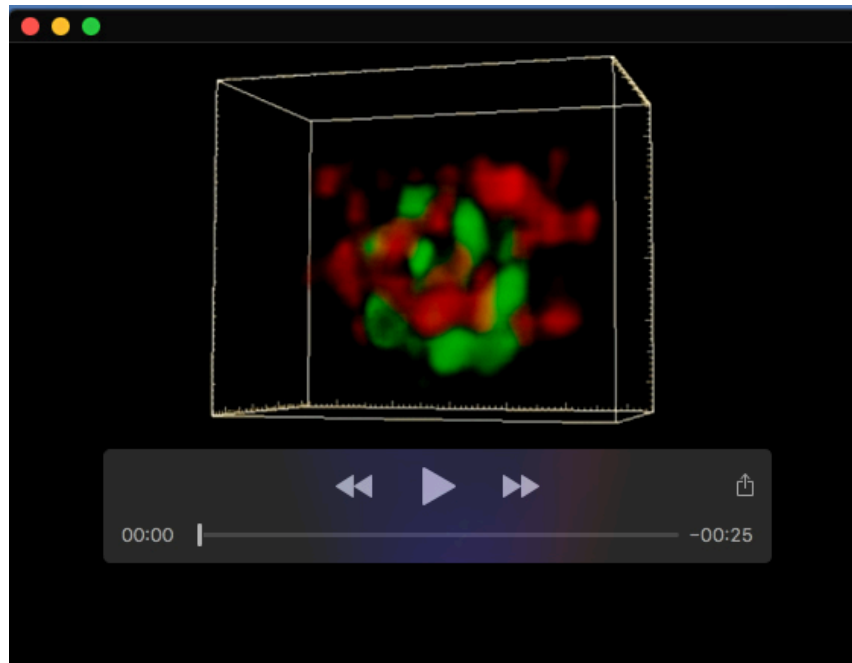

**Movie 1.** Super-resolution 3D Structured Illumination Microscopy (SIM) Video: 3D-SIM video showing co-localization of MCC (green) and PCNT (red) in SW480 cells at high magnification and different angles. 3D-video acquired using Imaris software (<https://imaris.oxinst.com>).
